# Supplementary material for: Implementing Three-Day Methadone in a Low-Threshold Bridge Clinic: Impact of OTP Referral Pathways on Treatment Retention
Source: Research Square preprint supplement (doi:10.21203/rs.3.rs-9088241/v1), 2026-04-16
Supplement: Supplementary file 1 [file af5668c7478f5bd86992c9e7.docx]

**BRIDGE CLINIC EMERGENCY OPIOID WITHDRAWAL PROTOCOL**

Based on Faster Paths/Boston Medical Center protocols, Jessica Taylor, MD

Version: October 2nd, 2024

The purpose of this protocol is to outline use of schedule II medications for emergency opioid withdrawal management under the provisions of the “72-hour-rule” or "three day rule" at the ZSFG Bridge Clinic (Title 21, Code of Federal Regulations, [**Part 1306.07**](https://www.ecfr.gov/current/title-21/chapter-II/part-1306/subject-group-ECFR1eb5bb3a23fddd0/section-1306.07)). This allows a practitioner who is not separately registered as an opioid treatment program (OTP), to administer or dispense (but not prescribe) schedule II medications to a patient for the purpose of relieving acute withdrawal symptoms while arranging for the patient's referral for treatment, under the following conditions:

1. Not more than a three-day supply of such medication may be dispensed to the person
2. This treatment may not be carried out for more than 3 days and;
3. This 72-hour period cannot be renewed or extended

This protocol addresses the use of **methadone** for opioid withdrawal management while arranging for placement in an OTP.

Methadone may be administered daily for up to 3 days or dispensed for up to 72 hours from a clinic supply as of the passage of AB2115.

| **Eligibility Requirements** | | | |
| --- | --- | --- | --- |
| Y | N | |  |
|  |  | | Moderate-severe opioid use disorder (OUD) for at least 12 months |
|  |  | | ≥18 years old and not currently incarcerated |
|  |  | | Current daily use of heroin or fentanyl and history of opioid withdrawal |
|  |  | | Able to present daily for observed medication administration for up to 72 hours unless presenting prior to weekend, in which case must be able to safely store medications for 72 hours |
|  |  | | Desires linkage to San Francisco OTP and able to be linked within 72 hours* |
| **Contraindications** | | | |
|  |  | Allergy or prior adverse reaction to methadone | |
|  |  | Already received 72 hours of methadone administered/dispensed from Bridge clinic (cannot extend a single episode) | |
|  |  | Actively enrolled in OTP (rare exceptions may apply, require dose confirmation with OTP and medical director approval) | |
|  |  | Current clinical evidence of opioid or other depressant intoxication | |
|  |  | Respiratory depression | |
|  |  | Sedation | |
|  |  | Known history of torsades (EKG at intake is not required) | |
|  |  | Any acute medical illness requiring higher level of care | |
|  |  | Patient unwilling to sign release of information (ROI) for relevant treaters | |
|  |  | Administratively discharged and currently unable to return to the OTP they desire to link to | |
|  |  | Concern for low opioid tolerance including: lack of daily use, lack of withdrawal history, use of only prescription opioids (rather than heroin or fentanyl) | |
|  |  | Declines to provide urine drug screen | |
| **Caution:** *Consider* *lower dose, delay in administration, +/- alternative therapy* | | | |
|  |  | Recent use of other prescribed or non-prescribed CNS depressants | |
|  |  | Withdrawal from alcohol or benzodiazepines | |
|  |  | Decompensated pulmonary, cardiac, or hepatic disease | |

| **Clinical Scenario 1:** New patient not currently enrolled in OTP |
| --- |
| 1. Document OUD diagnosis, duration, and severity using .bridgemethadone template. This may occur in person or by telehealth, rest of protocol needs to be completed with in-person provider. Confirm patient is eligible, no contraindications, including plan to connect to OTP within 72 hours |
| 1. Obtain baseline UDS (required prior to giving first dose). Do not need to wait for UDS results to proceed with protocol if clear history of moderate-severe OUD over 12 months, current reported daily opioid use, and history of opioid withdrawal. If upon results review UDS is positive for unexpected methadone or negative for opioids/fentanyl please inform OTP immediately |
| 1. Care coordination:    1. Check prescription drug monitoring program    2. Ask patient to sign ROI for active treaters    3. If patient is currently on buprenorphine, ask them to stop the buprenorphine |
| 1. Document COWS score, assess for any clinically evident sedation/intoxication    1. COWS can be added to flowsheets in Epic, use wrench/preferences to add COWS to your flowsheets for all patients    2. Current withdrawal is not required if history of withdrawal and no sedation/respiratory depression/clinically |
| 1. In most cases, obtain syphilis screening, QFT, and HCV testing (patients may decline, but labs are recommended). Additional tests that may be obtained prior to initiation: EKG (if risk factors for QTc prolongation), CBC and LFTs if concern for severe liver disease. All labs can be found under the 72h methadone preference list. |
| 1. Discuss OTP options with patient and come to a consensus on where patient should present and on what day.    1. Substance Use Navigator to contact OTP and verify no current administrative discharge. SUN will indicate that ROI and H&P will be faxed / emailed and confirm when the patient can present for intake. |
| 1. Provider to determine dosing schedule and appropriate initial dose    1. **First day of OTP dosing must be by day 4**, where day 1 is the first day of methadone administration in Bridge    2. It is acceptable to administer day 1-2 methadone and confirm plan for OTP intake on days 2-3 if patient is likely to be accepted to OTP    3. Determine appropriate initial dose       - 30 mg PO x 1 is a standard initial dose. **Consider 40 mg PO x 1 initial dose for patients with high tolerance and/or prior inadequate response to lower doses after risk/benefit discussion**       - Consider lower initial dose (e.g. 10-20 mg) in patients with decompensated hepatic/cardiac/pulmonary disease, medical frailty, or any concern for low opioid tolerance |
| 1. Order methadone dose as a one-time clinic administered medication |
| 1. Remove dose from omnicell    1. We stock 10 mg methadone tablets. Please see storage and administration guidelines for full information.    2. A daily count of the methadone 10 mg tablets must be completed at the start and the end of each clinic by a licensed nurse and a witness    3. Any methadone used, destroyed, or wasted in the clinic must be documented in the Omnicell    4. Any destruction or waste of doses of methadone shall be witnessed by additional licensed staff—you do not need a witness to dispense if medications are not being wasted |
| 1. The prescriber or registered nurse will administer dose to patient under observation |
| 1. Document administration in medication administration record (MAR) section of the EMR. |
| 1. Electronically prescribe intranasal naloxone to an outpatient pharmacy, distribute a naloxone kit directly to the patient, or document if patient declines. Offer comfort medication prescriptions to patient (use EHR preference list) |
| 1. In Assessment & Plan section of the visit encounter note, document under “Opioid Withdrawal” problem    1. Use .BRIDGEMETHADONE72h smartphrase and OUD macro for documentation |
| 1. Determine if patient will be getting dispensed supply or daily administration for subsequent doses    1. If linking to OTP next day, no subsequent doses should be required. If patient misses linkage, ok to continue with daily administration (see part b below)    2. If planning daily administration: on days 2-3, reassess COWS score. If opioid withdrawal remains uncontrolled, consider increasing methadone dose by up to 10 mg/day on day 2 (max dose 50mg) and additional 10 mg on day 3 (max dose 60 mg) based on clinical symptoms.    3. For dispensing medication, please see clinical scenario 3 |
| 1. Lock all Epic notes the day of the encounter so that OTOP and ED teams are aware of what occurred    1. Obtain written informed consent for referral and 2-way communication with OTP if not already obtained by OTP. Confirm receipt via phone with OTP. |
| **Clinical Scenario 2:** Patient started on methadone during inpatient admission and missed OTP linkage appointment or are unable to be linked at time of discharge but can be linked within 72 hours |
| - Contact OTP per protocol outlined in Clinical Scenario 1, verify the patient has not yet linked to OTOP/did not dose same day, and plan intake by day 4, where day 1 is the first day of methadone administration in Bridge.   1. Obtain written informed consent for referral and 2-way communication with OTP if not already obtained by OTP |
| - Confirm last dose in discharge summary and adjust if days of methadone missed (derived from updated OTOP guidelines), in each scenario return to 100% the next day:   1. No show x 1-4 = 100%   2. No show x 5 = 90%   3. No show x6 = 80%   4. No show x7 = 70%   5. No show x8 = 60%   6. Further missed days discuss with OTOP/make individualized plan |
| - Verify UDS was obtained in hospital, if not obtain UDS prior to administering dose |
| - Order, administer observed dose, and document medication administration in EMR and note as outlined in Clinical Scenario 1 above. In most cases these should be administration only, but in conversation with the medical director 72 hour dispensing may be approved. |
| - Treat on days 2-3, if needed, as above |
| - Address clinical and case management barriers (e.g. transportation) that contributed to missed linkage after discharge |
| - Lock all Epic notes the day of the encounter so that OTP and ED teams are aware of what occurred |
| **Clinical Scenario 3:** Dispensing methadone (not live until 9/29/25) |
| 1. Verify the patient is a candidate for dispensing:    1. Has received in clinic administered dose or ED/hospital administered dose    2. Unable to access next day methadone (generally Friday/Saturday/before holidays)    3. Able to safely store medication (especially out of reach of children/animals)    4. All other exclusion criteria for administration apply |
| 1. Order in Epic and dispense methadone from Omnicell. Use “Methadone 72 hour dispensing” order set.    1. The directions and quantity for the order written in Epic MUST reflect the handwritten directions and quantity on the prescription label handed to the patient |
| 1. Place the dispensed medication in the 30-dram vial with childproof caps.    1. Provide lockbox if indicated (in wooden drawers across from omnicell in med room    2. Large 30-dram vials with childproof caps & with “Caution: Opioid, risk of overdose & addiction” warning label affixed to bottle will be stored in drawer in med room labeled “Bridge Methadone Dispensing Supplies”    3. Using the pre-printed label with RX number that was documented on Omnicell, fill out the date, patient name, directions, expiration date, and initials |
| 1. Double-check the medication label against the prescription or medication order. Verify the patient’s name, order, medication name, dosage, route, and expiration date. |
| 1. Provide the patient with [printed instructions](https://ucsf.app.box.com/file/1984632678880) on how to take the medication, potential side effects, and any warnings. Answer any questions the patient may have. |
| 1. Lock all Epic notes the day of the encounter so that OTP and ED teams are aware of what occurred |
