# Supplementary material for: Implementing Three-Day Methadone in a Low-Threshold Bridge Clinic: Impact of OTP Referral Pathways on Treatment Retention
Source: Research Square preprint supplement (doi:10.21203/rs.3.rs-9088241/v1), 2026-04-16
Supplement: Supplementary file 2 [file b66cdd3e4032a439ca4c2b23.pdf]

## **Methadone**

### **What Is Methadone?**

Methadone is a medication used to treat Opioid Use Disorder (OUD). Methadone is a long-acting full opioid agonist, and a schedule II controlled medication. Methadone used to treat those with a confirmed diagnosis of opioid use disorder (OUD) can only be dispensed through a SAMHSA certified OTP, or from other sources for 72 hours in emergency situations.

Methadone is a medication approved by the Food and Drug Administration (FDA) to treat OUD as well as for pain management. When taken as prescribed, methadone is safe and effective. Methadone helps individuals achieve and sustain recovery and to reclaim active and meaningful lives. Methadone is one component of a comprehensive treatment plan, which includes counseling and other behavioral health therapies to provide patients with a whole-person approach.

### **How Does Methadone Work?**

Methadone, a long-acting opioid agonist, reduces opioid craving and withdrawal and blunts or blocks the effects of opioids. Taken daily, it is available in liquid, powder and diskettes forms. Most clinics offer it in liquid form.

### **How Can a Patient Receive Methadone?**

Patients taking methadone to treat OUD must receive the medication under the supervision of a practitioner. After a period of stability (based on progress and proven, consistent compliance with the medication dosage), patients may be allowed to take methadone at home between program visits.

The length of time a person receives methadone treatment varies. According to the National Institute on Drug Abuse publication *Principles of Drug Addiction Treatment: A Research-Based Guide (Third Edition)*, the length of methadone treatment should be a minimum of 12 months. Some patients may require long-term maintenance. Stopping methadone suddenly can cause withdrawal. Patients must work

with their practitioner to gradually reduce their methadone dosage to minimize withdrawal.

### **Methadone Safety**

Methadone is safe and effective, when taken as prescribed. Methadone medication is specifically tailored for the individual patient (and doses are often adjusted and readjusted) and is never to be shared with or given to others. This is particularly important for patients who take methadone at home and are not required to take medication under direct supervision at an OTP. Patients should share their complete health history, including a full list of medications they are on, with health providers to ensure the safe use of the medication.

Other medications may interact with methadone and cause heart conditions. Even after the effects of methadone wear off, the medication's active ingredients remain in the body for much longer. Unintentional overdose is possible if patients do not take methadone as prescribed

### **The following tips can help achieve the best treatment results:**

- Never use more than the amount prescribed and always take at the times prescribed. If a dose is missed, or if it feels like it's not working, do not take an extra dose of methadone
- Do not consume alcohol while taking methadone.
- Do not combine with other drugs, including opioids like heroin or fentanyl. The peak sedation from methadone occurs at 3-4 hours after a dose, so this is the highest risk time.
- Be careful driving or operating machinery on methadone.
- Call 911 if too much methadone is taken or if an overdose is suspected.
- Prevent children and pets from accidental ingestion by storing it out of reach (in a locked child proof container). For more information, visit CDC's Up and Away educational campaign. *Accidental consumption of even one dose by*

*someone other than you can be fatal, especially to a child.*

- Store methadone at room temperature and away from light.
- Do not share your methadone with anyone even if they have similar symptoms or suffer from the same condition.
- Dispose of unused methadone safely. Talk to your MOUD practitioner for guidance, or for more information on the safe disposal of unused medications, visit FDA's disposal of unused medicines or DEA's drug disposal webpages.

Learn more from the SAMHSA publication *Follow Directions: How to Use Methadone Safely – 2009* (also available in Spanish).

### **Common and Serious Side Effects of Methadone**

Side effects should be taken seriously, as some of them may indicate an emergency. Patients should stop taking methadone and contact a doctor or emergency services right away.

Patients and practitioners are encouraged to report all side effects online to MEDWatch, FDA's medical product safety reporting program for health care professionals, patients, and consumers or by calling 1-800-FDA-1088.

#### **Common side effects of methadone include:**

- Restlessness
- Nausea or vomiting
- Slow breathing
- Itchy skin
- Heavy sweating
- Constipation
- Sexual problems or low hormone levels

#### **Serious side effects of methadone include:**

- Have trouble breathing or shallow breathing
- Feel lightheaded or faint
- Experience hives or a rash; swelling of the face, lips, tongue, or throat

- Feel chest pain
- Experience a fast or pounding heartbeat—rarely this can be a life-threatening rhythm called torsades de pointes
- Experience hallucinations or confusion
- Oversedation or overdose

### **Pregnant or Breastfeeding Women and Methadone**

Women who are pregnant or breastfeeding can safely take methadone. Comprehensive methadone maintenance treatment should include prenatal care to reduce the risks of complications during pregnancy and at birth.

Undergoing methadone maintenance treatment while pregnant does not cause birth defects. Methadone's ability to prevent withdrawal symptoms helps pregnant women better manage their Opioid Use Disorder (OUD) while avoiding health risks to both mother and baby. Pregnant woman who experience withdrawal may be at risk of miscarriage or premature birth, as withdrawal can cause the uterus to contract.

It is possible that some babies may experience withdrawal, also known as neonatal abstinence syndrome (NAS) after birth. Symptoms may begin within minutes to hours after birth, with most symptoms appearing within 72 hours. It is possible for symptoms to appear as late as up to two weeks after birth. It is important to speak with your physician, as NAS is influenced by many factors.

Research has shown that the benefits of breastfeeding outweigh the effect of the small amount of methadone that enters the breast milk.

**Adapted from SAMHSA Patient Guidance, 9/10/25**
